# Supplementary material for: Nitrogen Limitation Alters the Response of Specific Genes to Biotic Stress
Source: MDPI journal article supplement (doi:10.3390/ijms19113364), 2018-10-27
Supplement: s1 [file s1]

**Table S1.** Genes with the most contrasted response to *Ea* in low and full N. Values are log2 signal ratios between *Ea*-infected and mock plants at low (0.5 mM NO<sub>3</sub><sup>-</sup>) and full N (5 mM NO<sub>3</sub><sup>-</sup>). Top: genes repressed by *Ea* only in plants grown in low N; middle: genes induced by *Ea* only in low N or more induced in low N; bottom: genes repressed by *Ea* only in full N or more repressed in full N. Asterisk (\*) indicate a significant difference between mock and infected plants according to the Bonferroni test (*P*-value < 0.05).

| AGI       | Name                                         | 0.5 mM NO <sub>3</sub> <sup>-</sup> 5 mM NO <sub>3</sub> <sup>-</sup> |            |
|-----------|----------------------------------------------|-----------------------------------------------------------------------|------------|
|           |                                              | Ea vs mock                                                            | Ea vs mock |
| AT1G09350 | Galactinol synthase 3                        | -3.37 *                                                               | -1.42      |
| AT3G19350 | Polyadenylate-binding protein-related        | -3.31 *                                                               | -0.85      |
| AT2G12905 | Unknown protein                              | -2.07 *                                                               | 0.08       |
| AT2G01021 | Unknown protein                              | -2.01 *                                                               | -0.09      |
| AT1G26630 | Eukaryotic elongation factor 5A-2            | -1.79 *                                                               | 0.06       |
| AT1G47450 | Unknown protein                              | -1.78 *                                                               | 0.17       |
| AT2G07681 | Cytochrome C assembly protein                | -1.72 *                                                               | 0.28       |
| AT2G07681 | Cytochrome C assembly protein                | -1.62 *                                                               | 0.29       |
| AT4G05631 | Unknown protein                              | -1.59 *                                                               | 0.51       |
| AT2G07681 | Cytochrome C assembly protein                | -1.52 *                                                               | 0.39       |
| AT1G61120 | Terpene synthase                             | 5.40 *                                                                | 3.47 *     |
| AT1G15670 | Kelch repeat-containing F-box family protein | 5.39 *                                                                | 3.23 *     |
| AT3G16530 | Legume lectin family protein                 | 4.61 *                                                                | 2.59 *     |
| AT5G35525 | Plac8 family protein                         | 3.92 *                                                                | 1.97 *     |
| AT1G80440 | Kelch repeat-containing F-box family protein | 3.61 *                                                                | -0.07      |
| AT3G46660 | UDP-Glycosyltransferase                      | 3.10 *                                                                | 1.11       |
| AT5G54610 | ANKYRIN (ANK)                                | 2.83 *                                                                | 0.59       |
| AT1G26800 | Zinc finger family protein                   | 2.74 *                                                                | 0.20       |
| AT3G04720 | Pathogenesis-related4 (PR4)                  | 2.43 *                                                                | 0.35       |
| AT2G14560 | Unknown protein                              | 2.02 *                                                                | -0.44      |
| AT3G49940 | LOB domain-containing protein 38             | 1.23 *                                                                | -0.71      |
| AT3G48360 | BTB and TAZ domain protein 2                 | -1.84 *                                                               | -4.16 *    |
| AT5G19190 | Unknown protein                              | -1.20                                                                 | -3.23 *    |
| AT4G32480 | Unknown protein                              | -0.96                                                                 | -3.23 *    |
| AT5G66580 | Unknown protein                              | -0.65                                                                 | -2.61 *    |
| AT1G49130 | Zinc finger family protein                   | 0.10                                                                  | -2.17 *    |
| AT3G16470 | Jacalin lectin family protein (JR1)          | 0.08                                                                  | -2.01 *    |
| AT1G23390 | Kelch repeat-containing F-box family protein | 0.24                                                                  | -1.97 *    |
| AT5G03350 | Legume lectin family protein                 | 0.91                                                                  | -1.88 *    |
| AT3G57240 | β-1,3-glucanase (BG3)                        | 1.06                                                                  | -1.63 *    |

**Table S2.** Modulation of WRKY TFs by *Ea* in low and full N. Values are log2 signal ratios between infected and mock plants grown 0.5 and 5 mM NO<sub>3</sub><sup>-</sup>. Two levels of significance threshold are presented according to the Bonferroni statistical test (a: *P*-value < 0.05; b: *P*-value < 1\*10<sup>-8</sup>).

| AGI       | Name                                                            | 0.5 mM NO <sub>3</sub> <sup>-</sup> | 5 mM NO <sub>3</sub> <sup>-</sup> |
|-----------|-----------------------------------------------------------------|-------------------------------------|-----------------------------------|
|           |                                                                 | Ea vs mock                          | Ea vs mock                        |
| AT3G58710 | "WRKY69 (WRKY DNA-binding protein 69); transcription factor"    | -1.21                               | -1.26 a                           |
| AT4G30935 | "WRKY32 (WRKY DNA-binding protein 32); transcription factor"    | -0.79                               | -0.30                             |
| AT2G03340 | "WRKY3 (WRKY DNA-binding protein 3); transcription factor"      | -0.58                               | -1.55 a                           |
| AT5G56270 | "WRKY2 (WRKY DNA-binding protein 2); transcription factor"      | -0.41                               | -0.01                             |
| AT4G26640 | "WRKY20 (WRKY DNA-binding protein 20); transcription factor"    | -0.28                               | -0.31                             |
| AT4G26640 | "WRKY20 (WRKY DNA-binding protein 20); transcription factor"    | -0.15                               | -0.04                             |
| AT2G47260 | "WRKY23 (WRKY DNA-binding protein 23); transcription factor"    | -0.15                               | -0.22                             |
| AT5G41570 | "WRKY24 (WRKY DNA-binding protein 24); transcription factor"    | -0.14                               | -0.04                             |
| AT1G64000 | "WRKY56 (WRKY DNA-binding protein 56); transcription factor"    | -0.13                               | 0.11                              |
| AT5G28650 | "WRKY74 (WRKY DNA-binding protein 74); transcription factor"    | -0.09                               | -0.05                             |
| AT2G46130 | "WRKY43 (WRKY DNA-binding protein 43); transcription factor"    | -0.01                               | 0.09                              |
| AT2G34830 | "WRKY35 (WRKY DNA-binding protein 35. ); transcription factor"  | 0.00                                | -0.06                             |
| AT4G26440 | "WRKY34 (MICROSPORE-SPECIFIC PROMOTER 3); transcription factor" | 0.00                                | -0.07                             |
| AT1G29280 | "WRKY65 (WRKY DNA-binding protein 65); transcription factor"    | 0.04                                | -0.51                             |
| AT1G30650 | "WRKY14 (WRKY DNA-binding protein 14); transcription factor"    | 0.04                                | 0.11                              |
| AT1G69310 | "WRKY57 (WRKY DNA-binding protein 57); transcription factor"    | 0.05                                | -0.28                             |
| AT1G55600 | "WRKY10 (MINISEED3); transcription factor"                      | 0.05                                | 0.17                              |
| AT3G62340 | "WRKY68 (WRKY DNA-binding protein 68); transcription factor"    | 0.19                                | 0.03                              |
| AT1G66600 | "WRKY63 (WRKY DNA-binding protein 63); transcription factor"    | 0.24                                | 0.14                              |
| AT3G01080 | "WRKY58 (WRKY DNA-binding protein 58); transcription factor"    | 0.32                                | 0.10                              |
| AT4G39410 | "WRKY13 (WRKY DNA-binding protein 13); transcription factor"    | 0.46                                | 0.25                              |
| AT4G12020 | "WRKY19 (WRKY DNA-binding protein 19); transcription factor"    | 0.47                                | 0.29                              |
| AT1G66550 | "WRKY67 (WRKY DNA-binding protein 67); transcription factor"    | 0.63                                | 1.33 a                            |
| AT1G66560 | "WRKY64 (WRKY DNA-binding protein 64); transcription factor"    | 0.69                                | 1.57 a                            |
| AT2G30590 | "WRKY21 (WRKY DNA-binding protein 21); transcription factor"    | 0.92                                | 0.51                              |
| AT1G13960 | "WRKY4 (WRKY DNA-binding protein 4); transcription factor"      | 0.94                                | 0.75                              |
| AT4G01720 | "WRKY47 (WRKY DNA-binding protein 47); transcription factor"    | 1.09                                | 1.49 a                            |
| AT4G04450 | "WRKY42 (WRKY DNA-binding protein 42); transcription factor"    | 1.32                                | 1.46 a                            |
| AT1G69810 | "WRKY36 (WRKY DNA-binding protein 36); transcription factor"    | 1.65 a                              | 1.73 a                            |
| AT5G52830 | "WRKY27 (WRKY DNA-binding protein 27); transcription factor"    | 1.70 a                              | 1.74 a                            |
| AT5G43290 | "WRKY49 (WRKY DNA-binding protein 49); transcription factor"    | 1.80 a                              | 2.49 b                            |
| AT4G31550 | "WRKY11 (WRKY DNA-binding protein 11); transcription factor"    | 1.97 a                              | 2.42 b                            |
| AT5G07100 | "WRKY26 (WRKY DNA-binding protein 26); transcription factor"    | 1.99 a                              | 2.51 b                            |
| AT1G80590 | "WRKY66 (WRKY DNA-binding protein 66); transcription factor"    | 2.00 a                              | 2.32 b                            |
| AT1G18860 | "WRKY61 (WRKY DNA-binding protein 61); transcription factor"    | 2.31 b                              | 2.81 b                            |
| AT5G01900 | "WRKY62 (WRKY DNA-binding protein 62); transcription factor"    | 2.34 b                              | 2.73 b                            |
| AT1G29860 | "WRKY71 (WRKY DNA-binding protein 71); transcription factor"    | 2.37 b                              | 2.34 b                            |
| AT2G21900 | "WRKY59 (WRKY DNA-binding protein 59); transcription factor"    | 2.41 b                              | 2.98 b                            |
| AT2G25000 | "WRKY60 (WRKY DNA-binding protein 60); transcription factor"    | 2.49 b                              | 1.77 a                            |
| AT2G24570 | "WRKY17 (WRKY DNA-binding protein 17); transcription factor"    | 2.55 b                              | 2.43 b                            |
| AT4G23810 | "WRKY53 (WRKY DNA-binding protein 53); transcription factor"    | 2.63 b                              | 2.24 b                            |
| AT4G24240 | "WRKY7 (WRKY DNA-binding protein 7); transcription factor"      | 2.66 b                              | 2.63 b                            |
| AT3G56400 | "WRKY70 (WRKY DNA-binding protein 70); transcription factor"    | 2.76 b                              | 1.69 a                            |
| AT3G04670 | "WRKY39 (WRKY DNA-binding protein 39); transcription factor"    | 2.90 b                              | 2.83 b                            |
| AT2G40750 | "WRKY54 (WRKY DNA-binding protein 54); transcription factor"    | 2.92 b                              | 2.22 b                            |
| AT2G23320 | "WRKY15 (WRKY DNA-binding protein 15); transcription factor"    | 3.14 b                              | 2.93 b                            |
| AT2G30250 | "WRKY25 (WRKY DNA-binding protein 25); transcription factor"    | 3.18 b                              | 2.53 b                            |
| AT5G46350 | "WRKY8 (WRKY DNA-binding protein 8); transcription factor"      | 3.38 b                              | 3.94 b                            |
| AT3G01970 | "WRKY45 (WRKY DNA-binding protein 45); transcription factor"    | 3.51 b                              | 3.45 b                            |
| AT4G11070 | "WRKY41 (WRKY DNA-binding protein 41); transcription factor"    | 3.54 b                              | 4.08 b                            |
| AT4G31800 | "WRKY18 (WRKY DNA-binding protein 18); transcription factor"    | 3.65 b                              | 4.09 b                            |
| AT5G26170 | "WRKY50 (WRKY DNA-binding protein 50); transcription factor"    | 3.66 b                              | 3.45 b                            |
| AT4G18170 | "WRKY28 (WRKY DNA-binding protein 28); transcription factor"    | 3.71 b                              | 3.00 b                            |
| AT5G49520 | "WRKY48 (WRKY DNA-binding protein 48); transcription factor"    | 3.78 b                              | 4.25 b                            |
| AT2G40740 | "WRKY55 (WRKY DNA-binding protein 55)"                          | 3.80 b                              | 4.61 b                            |
| AT1G62300 | "WRKY6 (WRKY DNA-binding protein 6); transcription factor"      | 3.85 b                              | 3.03 b                            |
| AT1G68150 | "WRKY9 (WRKY DNA-binding protein 9); transcription factor"      | 3.92 b                              | 4.39 b                            |
| AT5G15130 | "WRKY72 (WRKY DNA-binding protein 72); transcription factor"    | 3.94 b                              | 4.11 b                            |
| AT4G22070 | "WRKY31 (WRKY DNA-binding protein 31); transcription factor"    | 4.39 b                              | 4.76 b                            |
| AT5G13080 | "WRKY75 (WRKY DNA-binding protein 75); transcription factor"    | 4.83 b                              | 4.20 b                            |
| AT5G22570 | "WRKY38 (WRKY DNA-binding protein 38); transcription factor"    | 5.05 b                              | 3.68 b                            |
| AT2G38470 | "WRKY33 (WRKY DNA-binding protein 33); transcription factor"    | 5.22 b                              | 4.63 b                            |
| AT4G01250 | "WRKY22 (WRKY DNA-binding protein 22); transcription factor"    | 5.43 b                              | 5.75 b                            |
| AT1G80840 | "WRKY40 (WRKY DNA-binding protein 40); transcription factor"    | 5.59 b                              | 5.29 b                            |
| AT4G23550 | "WRKY29 (WRKY DNA-binding protein 29); transcription factor"    | 5.62 b                              | 6.34 b                            |
| AT2G46400 | "WRKY46 (WRKY DNA-binding protein 46); transcription factor"    | 5.65 b                              | 5.38 b                            |
| AT5G24110 | "WRKY30 (WRKY DNA-binding protein 30); transcription factor"    | 6.06 b                              | 6.11 b                            |
| AT5G64810 | "WRKY51 (WRKY DNA-binding protein 51); transcription factor"    | 6.97 b                              | 5.93 b                            |

**Table S3.** Response to single and combined stresses of selected N-related genes showing an independent profile. Values represent log 2 signal ratios of the fold-changes upon single stresses (N: N limitation; B: *Ea* infection) or combined stresses (N+B: N limitation and *Ea* infection). Most N-related genes that were modulated by at least one of the single stresses presented an independent profile in response to combined stresses (presented in this table). A few N-related genes presented non-predictable profiles in response to combined stresses and are presented in Table 2. N: N limitation; B: *Ea* infection; N+B: N limitation and *Ea* infection.

| Name   | AGI       | N     | B     | N+B   | Response mode |
|--------|-----------|-------|-------|-------|---------------|
| AMT1.2 | AT1G64780 | 0.17  | -4.09 | -4.18 | independent   |
| AAP3   | AT1G77380 | -0.46 | 3.33  | 3.47  | independent   |
| AMT2.1 | AT2G38290 | -0.73 | 3.55  | 2.91  | independent   |
| ASPG1  | AT3G16150 | -0.09 | 1.55  | 1.59  | independent   |
| ASPG1  | AT3G16150 | -0.09 | 1.55  | 1.59  | independent   |
| CAR1   | AT1G29900 | -0.61 | -1.15 | -1.55 | independent   |
| GABA-T | AT3G22200 | 0.28  | 1.11  | 1.15  | independent   |
| GAD1   | AT5G17330 | -0.05 | 6.84  | 6.34  | independent   |
| GAD2   | AT1G65960 | -0.57 | -1.46 | -1.92 | independent   |
| GAT1   | AT2G15570 | -0.51 | 1.93  | 1.50  | independent   |
| GDH2   | AT5G07440 | -0.62 | 1.96  | 1.98  | independent   |
| GLN1.1 | AT5G37600 | -0.62 | 1.96  | 1.72  | independent   |
| GLN1.2 | AT1G66200 | -0.51 | -2.42 | -2.04 | independent   |
| GLN1.4 | AT5G16570 | 0.29  | 3.43  | 3.57  | independent   |
| GLU1   | AT5G04140 | 0.05  | -2.23 | -2.11 | independent   |
| GS2    | AT5G35630 | -0.48 | -1.61 | -2.51 | independent   |
| NIA1   | AT1G77760 | -2.37 | -0.89 | -1.60 | independent   |
| Nitr   | AT1G68570 | -0.03 | -4.27 | -4.08 | independent   |
| NRT1.1 | AT1G12110 | -0.69 | -1.78 | -1.92 | independent   |
| NRT1.5 | AT1G32450 | 0.16  | -1.58 | -1.66 | independent   |
| NRT1.7 | AT1G69870 | -0.17 | -1.67 | -2.07 | independent   |
| NRT2.1 | AT1G08090 | 0.40  | 2.34  | 1.64  | independent   |
| NRT2.5 | AT1G12940 | 0.09  | 4.53  | 4.14  | independent   |
| NRT2.6 | AT3G45060 | -0.09 | 6.23  | 6.06  | independent   |
| NRT2.7 | AT5G14570 | -0.20 | -2.62 | -2.69 | independent   |

**Table S4.** Sequence of the gene-specific primers used in this analysis.

| <i>A. thaliana</i> genes | LP                   | RP                      |
|--------------------------|----------------------|-------------------------|
| <i>PR1</i>               | TCTCCCTCGAAAGCTCAAGA | GTGCCTGGTTGTGAACCCCTTA  |
| <i>PR5</i>               | GCCGTGGAGCTAACGATAAG | GCGTAGCTATAGGCGTCAGG    |
| <i>WRKY33</i>            | CATTCTGCCACCAAAGGAT  | TTGATTGGTTTATTCCGTGTTT  |
| <i>WRKY60</i>            | GGGTCACCCCATTTTATCT  | GGCATCACATTCTTCTCTAATGG |

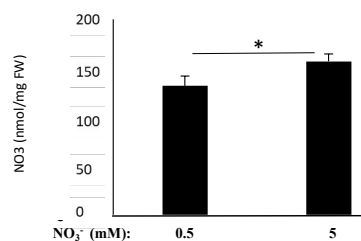

**Figure S1.** Nitrate content in Arabidopsis rosette leaves grown under low (0.5 mM) or full (5 mM) nitrate. Nitrate content was measured using the Miranda method [45] in 25 mg ground and frozen leaves. Each biological replicate corresponds to 4 leaves of a single plant. Values presented correspond to the mean and SE of three individual replicates. The asterisk (\*) indicates a significant difference between the two N nutritional conditions according to the Mann-Whitney test ( $P$ -value < 0.05).

|                                        |         | This study |       | Moreau |
|----------------------------------------|---------|------------|-------|--------|
|                                        |         | HN         | LN    |        |
| Response to salicylic acid             |         |            |       |        |
| AT3G52430                              | PAD4    | 4,51       | 5,15  | 3,23   |
| AT1G74710                              | ICS1    | 5,73       | 6,14  | 3,48   |
| AT4G39030                              | EDS5    | 6,03       | 6,13  | 2,22   |
| AT3G48090                              | EDS1    | 3,82       | 3,85  | 1,94   |
| AT1G21270                              | WAK2    | 1,41       | 1,63  | 1,46   |
| AT1G64280                              | NPR1    | 1,66       | 2,14  | 1,03   |
| Response to jasmonic acid and ethylene |         |            |       |        |
| AT4G17500                              | ERF1    | 1,92       | 1,93  |        |
| AT3G12500                              | CHI-B   |            |       |        |
| AT1G66340                              | ETR1    |            |       |        |
| AT1G75830                              | PDF1.1  | 1,22       | 1,86  | -1,25  |
| AT5G42650                              | AOS     | -2,13      |       | -1,28  |
| AT3G16470                              | JL      | -2,01      |       | -0,95  |
| AT1G13280                              | AOX     | -2,61      |       | -0,95  |
| AT1G19640                              | JMT     |            |       |        |
| AT2G43710                              | SSI2    | -1,36      |       |        |
| AT2G06050                              | OPR3    |            |       |        |
| AT2G39940                              | COI1    |            |       |        |
| Response to oxidative stress           |         |            |       |        |
| AT3G22370                              | AOX1A   | 2,72       | 2,63  | 2,01   |
| AT1G64060                              | RbohF   | 1,53       | 0,91  | 1,69   |
| Flavonoid biosynthesis                 |         |            |       |        |
| AT5G13930                              | CHS     | -2,00      | -1,77 |        |
| AT5G08640                              | FLS     | -3,83      |       | -1,34  |
| Resistance genes                       |         |            |       |        |
| AT1G66090                              | NBS-LRR | 5,11       | 5,30  | 4,63   |
| AT3G14470                              | NBS-LRR | 3,77       | 3,88  | 2,02   |
| AT4G11170                              | NBS-LRR | 7,45       | 7,00  | 1,54   |
| AT5G51630                              | NBS-LRR | 3,43       | 3,27  | 0,96   |
| AT4G14370                              | NBS-LRR | 2,96       | 2,68  | 1,39   |
| AT4G33300                              | NBS-LRR | 2,66       | 2,80  | 1,92   |
| AT5G45510                              | NBS-LRR | 1,87       | 2,66  | 1,17   |
| AT1G17615                              | NBS-LRR | 1,58       | 1,82  |        |
| AT5G38350                              | NBS-LRR | 1,29       | 0,93  |        |
| AT4G19530                              | NBS-LRR | -1,75      |       | -1,25  |

**Figure S2.** Modulation profile of previously identified *Arabidopsis Ea*-responsive genes. In the three columns, the values represent the log<sub>2</sub> ratios between *Ea*-infected and mock-treated five-week-old *A. thaliana* Col-0 leaves. The first two columns correspond to data from the present study for plants grown in full (5 mM; HN) or low NO<sub>3</sub><sup>-</sup> (0.5 mM; LN). The last column on the right (Moreau) corresponds to a previous dataset corresponding to plants grown in standard growth conditions [21]. Values corresponding to *Ea*-induced and repressed genes are highlighted respectively in pink and green. The log<sub>2</sub> ratio for genes not significantly modulated according to the Bonferroni statistical test (*P*-value < 0.05) appear in black.

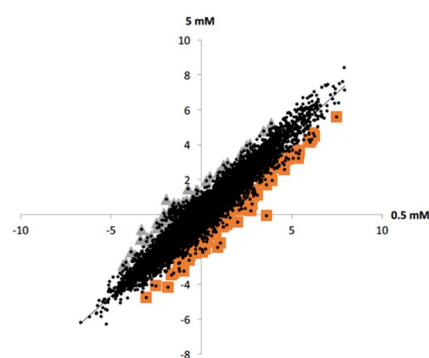

**Figure S3.** Correlation of transcriptome data. Correlation between log<sub>2</sub> values of the fold-changes upon *Ea* infection in plants grown in low (0.5 mM NO<sub>3</sub><sup>-</sup>) and full N (5 mM NO<sub>3</sub><sup>-</sup>). Each black dot represents a single gene. Gray and orange dots correspond to genes with the most contrasted response to *Ea* in low and full N; Grey: higher modulation by *Ea* in 5 mM NO<sub>3</sub><sup>-</sup>; orange: higher modulation by *Ea* in 0.5 mM NO<sub>3</sub><sup>-</sup>.
